# Supplementary material
Source: PubMed Central journal article supplement (PMC2878520)
Supplement: supp_M109.076414_jbc.M109.076414-1.pdf [file supp_M109.076414_jbc.M109.076414-1.pdf]

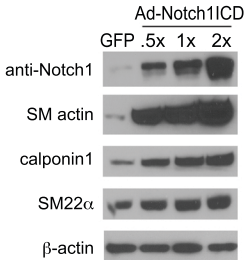

Supplemental Figure S1. Dose dependent induction of SM markers by Notch1ICD. Cell lysates from SMC transduced with different concentrations of Notch1ICD were collected after 3d and analyzed for SM actin, calponin1, and SM22 $\alpha$  to optimize viral dosage, and 1x concentration was used for all further experiments.
